# Supplementary material for: Model-Based Analyses for the Causal Relationship Between Post-stroke Impairments and Functional Brain Connectivity Regarding the Effects of Kinesthetic Illusion Therapy Combined With Conventional Exercise
Source: Front Syst Neurosci. 2022 Jan 10;15:804263. doi: 10.3389/fnsys.2021.804263 (PMC8842648; doi:10.3389/fnsys.2021.804263)
Supplement: Supplementary file 1 [file Table_1.XLSX]

## Sheet: S1
Results of paired t-tests
		Pre-test	Post-test	t-Value	P-Value	Hedges' g
FMA	Upper extremity total score	12.2 ± 2.9SD	14.5 ± 4.0SD	3.96	0.003	0.68
ARAT	Total score	5.3 ± 4.4SD	8.1 ± 7.6SD	2.7	0.02	0.48
	ARAT-F	2.4 ± 3.0SD	4.7 ± 6.1SD	2.36	0.04	0.52
	ARAT-S	2.9 ± 1.6SD	3.4 ± 1.9SD	1.61	0.14	0.26
MAS	2nd to 5th finger flexor muscles	3.7 ± 0.5	2.7 ± 1.0	-3.32	0.008	-1.33
	Wrist flexor muscles	3.0 ± 1.2	1.8 ± 1.1	-4.49	0.001	-1.05
Results of correlation analyses
	r-Value	P-Value
Pre-test FMA and FMA-D	0.37	0.27
Pre-test ARAT and ARAT-D	0.87	< .001
Pre-test ARAT-F and ARAT-FD	0.88	< .001
Pre-test ARAT-S and ARAT-SD	-0.94	0.78

## Sheet: S2
Standardized results in the mediation model
			Estimate	S.E.	P-Value
Path coefficient	FMA	on KINVIS	0.092	0.261	0.724
		on MAS	-0.45	0.182	0.013
	ARAT-F	on KINVIS	-0.019	0.282	0.947
		on MAS	-0.524	0.213	0.014
	MAS	on KINVIS	-0.523	0.173	0.003
	ARAT-S	on MAS	-0.532	0.113	< .001
Correlation	ARAT-S	with FMA	0.533	0.153	< .001
	ARAT-F	with FMA	0.422	0.119	< .001
		with ARAT-S	0.557	0.146	< .001
Intercept	FMA		3.426	0.704	< .001
	ARAT-S		1.596	0.422	< .001
	ARAT-F		0.498	0.552	0.367
Residual variance	FMA		0.746	0.151	< .001
	ARAT-S		0.717	0.12	< .001
	ARAT-F		0.735	0.181	< .001
R-square	MAS		0.273	0.181	0.132
	FMA		0.254	0.151	0.094
	ARAT-S		0.283	0.12	0.018
	ARAT-F		0.265	0.181	0.143

## Sheet: S3
Standardized results in the multiple regression model
			Estimate	S.E.	P-Value
Path coefficient	FMA	on aIPS-uIPS	0.234	0.19	0.218
		on aSMG-Vermis	0.123	0.158	0.437
		on uIPL-uPMd	-0.941	0.15	< .001
	ARAT-S	on aIPS-uIPS	-0.142	0.262	0.588
		on aSMG-Vermis	0.228	0.134	0.089
		on uIPL-uPMd	-0.674	0.244	0.006
	ARAT-F	on aIPS-uIPS	-0.492	0.218	0.024
		on aSMG-Vermis	0.247	0.221	0.266
		on uIPL-uPMd	-0.212	0.281	0.452
Correlation	ARAT-S	with FMA	0.329	0.244	0.177
	ARAT-F	with FMA	0.473	0.179	0.008
		with ARAT-S	0.337	0.206	0.102
Intercept	FMA		5.386	1.009	< .001
	ARAT-S		3.329	0.536	< .001
	ARAT-F		2.56	0.369	< .001
Residual variance	FMA		0.368	0.158	0.02
	ARAT-S		0.331	0.146	0.024
	ARAT-F		0.482	0.191	0.012
R-square	FMA		0.632	0.158	< .001
	ARAT-S		0.669	0.146	< .001
	ARAT-F		0.518	0.191	0.007

## Sheet: S4
Standardized results in the multiple regression model
			Estimate	S.E.	P-Value
Path coefficient	FMA-D	on aIPS-uIPS	0.076	0.351	0.828
		on aSMG-Vermis	0.248	0.213	0.244
		on uIPL-uPMd	-0.354	0.347	0.307
	ARAT-FD	on aIPS-uIPS	-0.498	0.203	0.014
		on aSMG-Vermis	0.378	0.161	0.019
		on uIPL-uPMd	-0.158	0.277	0.57
Correlation	ARAT-FD	with FMA-D	-0.237	0.24	0.325
Intercept	FMA-D		1.84	0.619	0.003
	ARAT-FD		2.518	0.339	< .001
Residual variance	FMA-D		0.85	0.177	< .001
	ARAT-FD		0.439	0.163	0.007
R-square	FMA-D		0.15	0.177	0.397
	ARAT-FD		0.561	0.163	0.001
